# Supplementary material
Source: Elsevier journal article supplement (https://www.sciencedirect.com/science/article/pii/S1413867016305633)
Supplement: mmc1 [file S1413867016305633:mmc1.pdf]

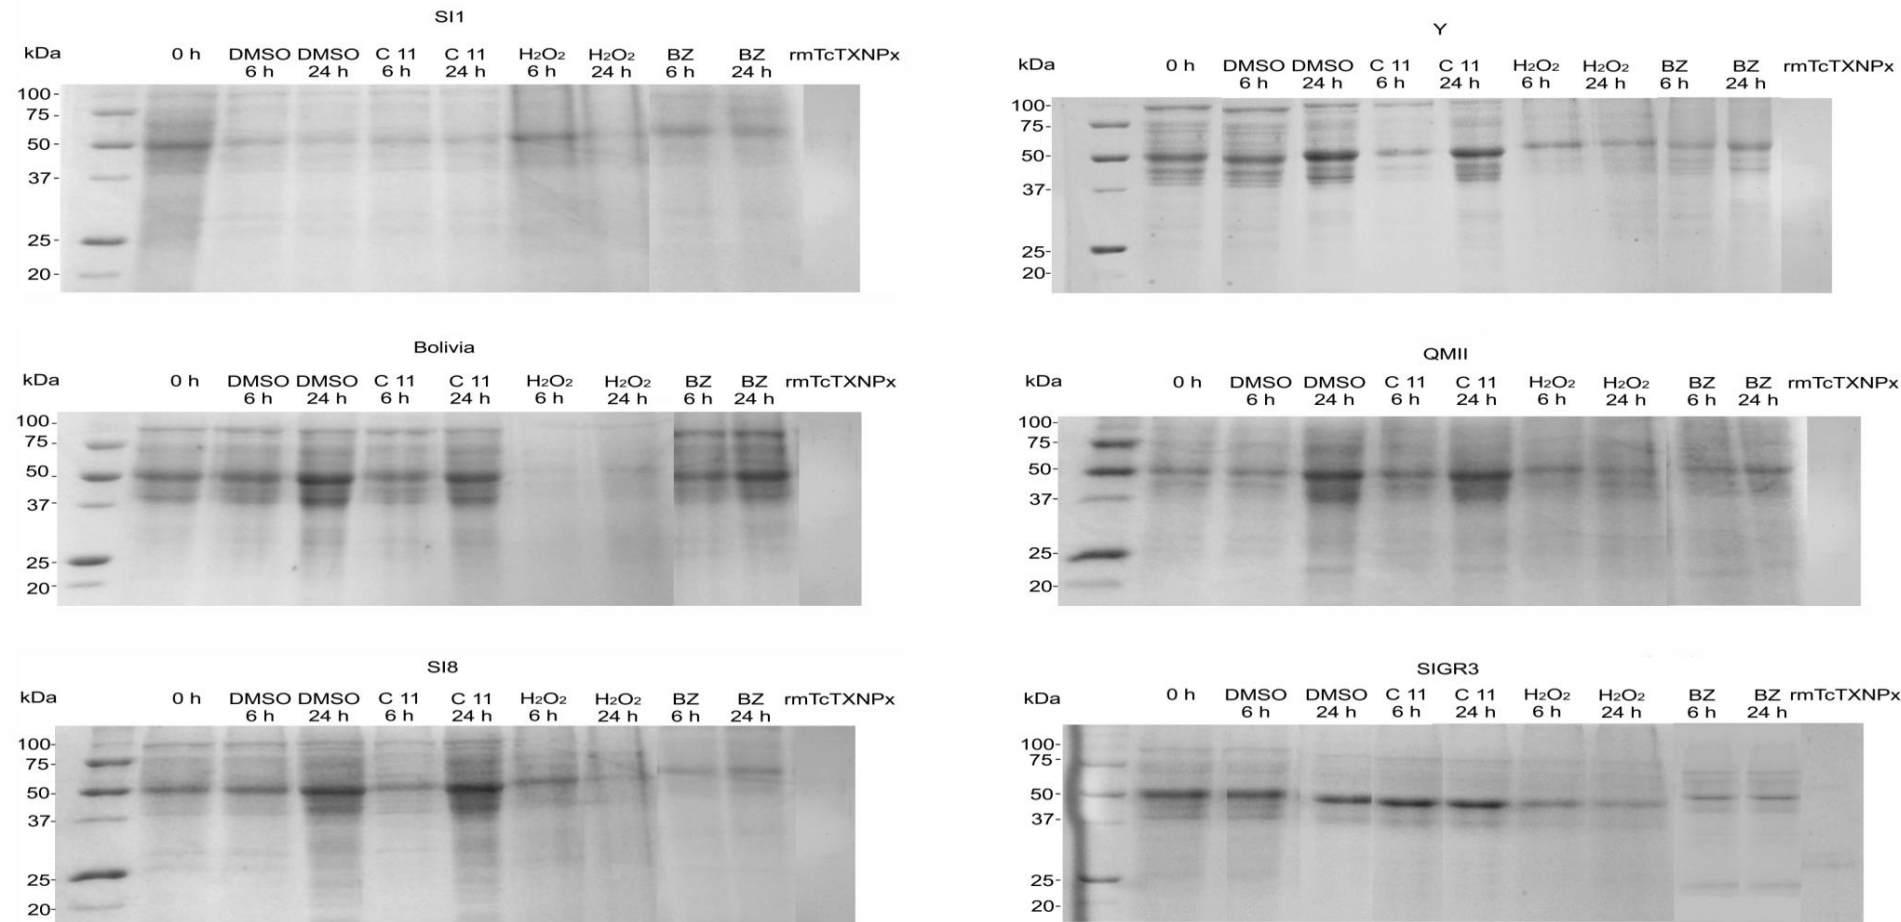

# Supplementary data

0 h, initial time; BZ, benznidazole; rmTcTXNPx, mTcTXNPx recombinant protein.

10% SDS-PAGE gel showing the expression of mTcTXNPx with rmTcTXNPx as a control stained with 0.1% Coomassie blue R-250. After treatment with compound **11** and BZ, 10 µg of the proteins present in the total extract samples from *T. cruzi* were applied to the gel.
